# Supplementary material for: An Unconventional Diacylglycerol Kinase That Regulates Phospholipid Synthesis and Nuclear Membrane Growth
Source: PubMed Central journal article supplement — J Biol Chem. 2008 Jul 18;283(29):20433–42. doi: 10.1074/jbc.M802903200 (PMC2459266; doi:10.1074/jbc.m802903200), 2008-07-18
Supplement: M802903200_1.pdf [file M802903200_1.pdf]

## *Gil-Soo Han*

---

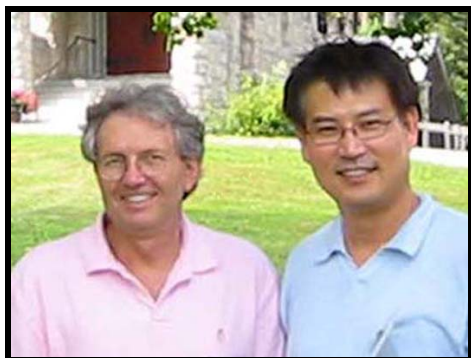

*George M. Carman (left) and Gil-Soo Han*

**Current Position:** Assistant Research Professor in the Department of Food Science at Rutgers University

**Education:** Ph.D. from Rutgers University; B.S., M.S. from Sogang University in Korea

**Non-scientific Interests:** Tennis, soccer

After completing my Ph.D. studies, I began post-doctoral training with George Carman, whose laboratory focuses on the biochemical and molecular characterization of phospholipids in yeast. During this time I became very interested in phospholipid metabolism and lipid signaling. Together with Drs. Carman and Symeon Siniossoglou at University of Cambridge, we have now managed to find this unusual diacylglycerol kinase.

---

**Read Dr. Han's article entitled:** An Unconventional Diacylglycerol Kinase That Regulates Phospholipid Synthesis and Nuclear Membrane Growth

<http://www.jbc.org/cgi/content/full/283/29/20433>
